1 **Rapid non-destructive method to phenotype stomatal traits**

2

3 Phetdalaphone Pathoumthong<sup>1</sup>, Zhen Zhang<sup>2</sup>, Stuart Roy<sup>1,3</sup>, Abdeljalil El Habti<sup>1\*</sup>

4

5 <sup>1</sup>School of Agriculture, Food and Wine, The University of Adelaide, Urrbrae 5064, Australia

6 <sup>2</sup>Australian Institute for Machine Learning, The University of Adelaide, Adelaide 5000,

7 Australia

8 <sup>3</sup>Australian Research Council Industrial Transformation Training Centre for Future Crops

9 Development, The University of Adelaide, Urrbrae 5064, Australia

10 \* Corresponding author: [abdeljalil.elhabti@adelaide.edu.au](mailto:abdeljalil.elhabti@adelaide.edu.au)

11 **Abstract**

12

13 **Background:** Stomata are tiny pores located on the leaf surface that are central to gas  
14 exchange. Stomatal number, size and aperture are key determinants of plant transpiration and  
15 photosynthesis, and any variation in these traits can affect plant growth and productivity.  
16 Current methods to screen for stomatal phenotypes are tedious, which impedes research on  
17 stomatal physiology and hinders efforts to develop resilient crops with optimised stomatal  
18 patterning. We developed a rapid non-destructive method to phenotype stomatal traits in four  
19 species: wheat, rice, tomato, and Arabidopsis.

20

21 **Results:** The method consists of two steps. The first step is to capture images of a leaf surface  
22 directly and non-destructively using a handheld microscope, which only takes a few seconds  
23 compared to minutes using other methods. This rapid method also provides higher quality  
24 images for automated data analysis. The second step is to analyse stomatal features using a  
25 machine-learning model that automatically detects, counts stomata and measures size. The  
26 accuracy of the machine-learning model in detecting stomata ranged from 89% to 96%,  
27 depending on the species.

28

29 **Conclusions:** We developed a method that combines rapid non-destructive imaging of leaf  
30 surfaces with automated image analysis. The method provides accurate data on stomatal  
31 features while significantly reducing time for data acquisition. It can be readily used to  
32 phenotype stomata in large populations in the field and in controlled environments.

33

34 **Keywords:** Stomata, phenotyping, non-destructive, handheld microscope, machine learning

35

## 36 **Background**

37           Stomata are tiny pores located on the surface of leaves and other parts of plants such  
38 as the stem and floral parts (1). Stomata play an essential role in gas exchange. About 98% of  
39 carbon dioxide (CO<sub>2</sub>) uptake and water loss from the plant occur through the stomatal  
40 aperture (2). When stomata open, it allows plants to uptake CO<sub>2</sub> from the atmosphere for  
41 producing carbohydrates by photosynthesis. Simultaneously, water evaporates through  
42 transpiration (3,4). When water is available, stomata remain open and assimilation and  
43 transpiration rates are high, which results in the optimal growth of plants (5). When water is  
44 less available, stomata close, which reduces water loss but also reduces CO<sub>2</sub> uptake for  
45 photosynthetic assimilation, resulting in slower growth. To maintain plant growth and avoid  
46 stress, gas exchange must be balanced to maximize CO<sub>2</sub> uptake for photosynthesis and  
47 minimize the water loss through transpiration (2).

48           Important factors that influence stomatal transpiration are the stomatal density, and  
49 size, the guard cell shape, and the presence or absence of subsidiary cells (4,6). All these  
50 factors can affect the amount of CO<sub>2</sub> fixed for photosynthesis, the stomatal conductance, and  
51 the water-use efficiency in plants (4). Plants show a range of stomatal sizes and shapes on the  
52 leaf epidermis which depends on the plant species, the variety within the species, and the  
53 stomatal response to environmental conditions (4).

54           Considering that the increasing global temperature directly affects drought severity,  
55 improving crop water-use efficiency is critical to improving yield under drought conditions  
56 (6,7). Because plant water use is controlled by stomata, understanding how stomata develop  
57 and respond to the environment will help to identify traits for tolerance to drought. The  
58 introduction of optimal stomatal distribution and behaviour into crops will help plants adapt  
59 to predicted warmer climates. Current knowledge on stomata is limited because studying and  
60 phenotyping stomata is labour-intensive, time-consuming, and costly process. The method

61 commonly used to investigate stomatal traits is the nail polish method. It consists of applying  
62 nail polish on the leaf surface to make an imprint that includes stomata, examining the leaf  
63 imprints under a light microscope, and analyse images manually to determine the stomata  
64 number and size (8,9,10,11,12). However, this approach has some limitations: the leaf  
65 imprint obtained by using nail polish does not consistently provide the desired image, which  
66 impedes analysis. One common issue is the unavoidable presence of air bubbles that  
67 interferes with the image clarity, which can make data analysis tedious, and thus increase the  
68 time required to measure stomatal traits (13). In addition, analysing images manually  
69 involves human error and can result in inaccurate data. Another cause of inaccurate data is  
70 the irregularity of stomatal imprints, which makes it difficult to focus on all the samples in  
71 one image.

72 Another major limitation in using the nail polish method is the time it takes to acquire  
73 data. Up to 20 minutes per sample may be required from nail polish application to image  
74 analysis (13), and up to 15 minutes per sample may be required for the manual analysis of the  
75 stomata (number and size). This factor limits the number of leaf samples for which  
76 phenotyping can be conducted in a day, which prevents the application of the method to be  
77 applied on a large scale to screen, such as for measuring stomatal traits in large populations  
78 (13).

79 To overcome this limitation, many methods have included a machine-learning  
80 program to accelerate image analysis. However, most of these programs were developed  
81 based on images obtained from nail polish imprints (13,14,15). Although machine-learning  
82 approach reduces the time taken to acquire data, obtaining satisfactory images using nail  
83 polish remains difficult and the method cannot be applied on a large scale. Although some  
84 recent methods have used a handheld microscope (HBM) as an alternative for the nail polish

85 imprints, but these methods either provide information on stomata number or aperture  
86 change, not stomata size (14,16,17) and the experimental settings are not portable.

87       Thus, it is important to develop a rapid non-destructive method for stomata  
88 phenotyping that provides information on stomatal features to facilitate research on large  
89 populations of stomata in order to characterise the diversity in stomata structure in plants. In  
90 this study, we developed a method that rapidly provides information on stomata number and  
91 size by combining a HHM for stomata imaging and a machine-learning model to automate  
92 stomata analysis of microscope images. We developed this method for four species: wheat,  
93 rice, tomato, and Arabidopsis.

94

## 95 **Materials and Methods**

### 96 **Plant material**

97 The study focused on four plant species (two monocotyledons and two dicotyledons): wheat  
98 (*Triticum. aestivum* cv. Cadenza and Gladius), tomato (*Solanum lycopersicum*. cv. Sweetbite  
99 and Mighty Red), rice (*Oryza sativa*. cv. R12), and Arabidopsis (*Arabidopsis thaliana*. cv.  
100 Columbia). Wheat, tomato, and rice plants were grown in a glasshouse located at the latitude  
101 of 34°58'16.72"S and longitude of 138°38'23.17"E under natural photoperiod. Wheat plants  
102 were grown from June to October 2021 with 5 replicates in 20 cm pots containing the UC  
103 David soil mix (50% peat and 50% sand), at 22°C/15°C day/night. Tomato plants were  
104 grown from July to November 2021 with 10 replicates in 20 cm pots containing UC David  
105 soil mix, at 22°C/15°C day/night with fertiliser (All Purpose, Scotts Osmocote, New  
106 Zealand). Rice plants were grown from September to December 2021 in 5 replicates in 15 cm  
107 pots containing the UC David soil mix, at 29°C/21°C day/night, and were supplemented with  
108 an iron solution (EDTA (III) ferric salt, and silwet) for the first 4 weeks. Arabidopsis plants  
109 were grown from November 2021 to January 2022 with 12 replicates in 8 cm pots containing

110 the Arabidopsis mix soil (Coir 3.6L, Perlite 3.6L & Sand 0.25L). Arabidopsis were grown in  
111 a growth cabinet at 23°C/19°C day/night, with 12 hours photoperiod. The plants were  
112 supplemented weekly with Murashige & Skoog Modified Basal Medium with Gamborg  
113 Vitamins (Phyto Technology Laboratories, United States).

114

#### 115 **Stomatal imprints: Nail polish method**

116 Stomatal imprints were collected by using nail polish applied to the adaxial and abaxial leaf  
117 surface of 4-month-old wheat, 2-month-old rice, 3-month-old tomato and 2-month-old  
118 Arabidopsis. Nail polish (Insta-Dri Anti Chip Top Coat, Sally Hansen, USA) was applied  
119 gently on the leaf surface in a thin layer, and left to air dry for 5-7 minutes. Clear tape  
120 (Crystal clear office tapes, Winc, Australia) was used to peel the dry nail polish off the  
121 surface of the leaf and it was put it a microscope slide. A light microscope (Nikon Ni-E  
122 compound microscope, Tokyo, Japan) with NIS-elements software (Nikon) was used to  
123 capture images of stomatal imprints. The stomatal imprint images were cropped to  $0.73 \times$   
124  $0.57$  mm for wheat, rice, and tomato and  $0.3 \times 0.3$  mm for Arabidopsis, so that stomatal  
125 imprints images and HHM images have the same size to allow for comparison. The number  
126 of stomata was determined manually by counting the stomata one by one in each individual  
127 image.

128

#### 129 **Stomata images: Handheld microscope method**

130 An HHM (ProScope, USA) was used to take images of leaves directly (**Fig. 1a**). The  
131 ProScope Capture v6.14 software was used to connect the microscope to a computer. 100×,  
132 200×, and 400× magnifications were used to take images of wheat stomata, while only the  
133 400× magnification was used for rice, tomato, and Arabidopsis, because of the stomata size.

134 Arabidopsis images taken from the HHM were cropped into  $0.3 \times 0.3$  mm images because  
135 the edge of the field of view is generally out of the field of focus.

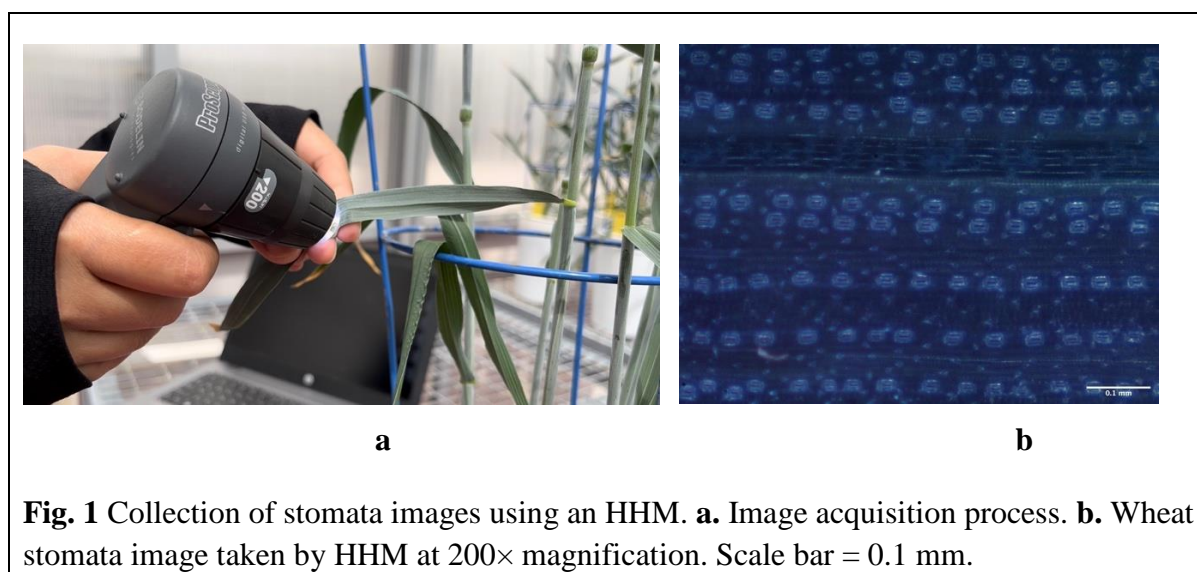

136

### 137 **Machine-learning model training**

138 Images taken with the HHM were used to train the machine-learning model to recognize  
139 stomata separately for each species and magnification. The open-source software LabelImg  
140 (18) was used to annotate images by labelling a bounding box around each stomata. The  
141 annotated images were uploaded to rowboflow.com for image processing and were made  
142 publicly available. The YOLOv5 software was used to train for stomatal detection in Google  
143 Colab. The object detection model was saved in Google Drive. A different set of stomata  
144 images from the HHM were used to assess the accuracy of the stomata detection model using  
145 two parameters: level of precision and recall. Precision measures the model's confidence in  
146 classifying a detected object as stomata. Recall reflects the percentage of detected stomata  
147 among all existing stomata (19). In the model, stomata number was determined by the  
148 number of bounding boxes around stomata, and stomata size refers to the area of the  
149 bounding box.

150

## 151 **Results**

### 152 **Optimal magnification**

153 The HHM has three different magnifications: 100× (2.87 × 2.17 mm field of view); 200×  
154 (1.36 × 1.03 mm field of view); and 400× (0.75 × 0.57 mm field of view). Each  
155 magnification could provide information on the stomata number and/or size, depending on  
156 the plant species (Supp. Fig. 1). For wheat, a 100× magnification could be used to count the  
157 number of stomata (Supp. Fig. 1a), whereas the 200× magnification was suitable for both  
158 counting the number and determining the size of stomata (Supp. Fig. 1b). The 400×  
159 magnification could also be used for determining the number and size of wheat stomata  
160 (Supp. Fig. 1c). For rice, tomato, and Arabidopsis, only the 400× magnification could be used  
161 to determine the number and size of stomata (Supp. Fig. 1 d-f) because their stomata are  
162 smaller than those observed in wheat.

163

### 164 **Comparison between nail polish images and HHM images**

165 The number of stomata counted in nail polish images and HHM images were comparable in  
166 wheat, tomato and Arabidopsis, but the number of stomata counted in HHM images were  
167 slightly higher than in nail polish images in rice (**Table 1**).

168 **Table 1 Comparison between the number of stomata obtained from nail polish imprints**  
169 **and HHM images.**

| Name of plants | Number of Stomata   |            |
|----------------|---------------------|------------|
|                | Nail polish imprint | HHM images |
| Wheat          | 18–35               | 22–37      |
| Tomato         | 51–71               | 60–82      |
| Arabidopsis    | 14–21               | 15–25      |
| Rice           | 77–110              | 115–151    |

170

171 The HHM provided better quality images faster than did the nail polish method.

172 Although images taken using the light microscope from nail polish imprints were at higher



173 resolution, air bubbles were frequently present in the samples (**Fig. 2 a, c, e, g**). Images taken  
174 with the HHM were at a lower resolution but were clear enough to allow for automated  
175 recognition and analysis using the machine-learning model (**Fig. 2 b, d, f, h**).  
176

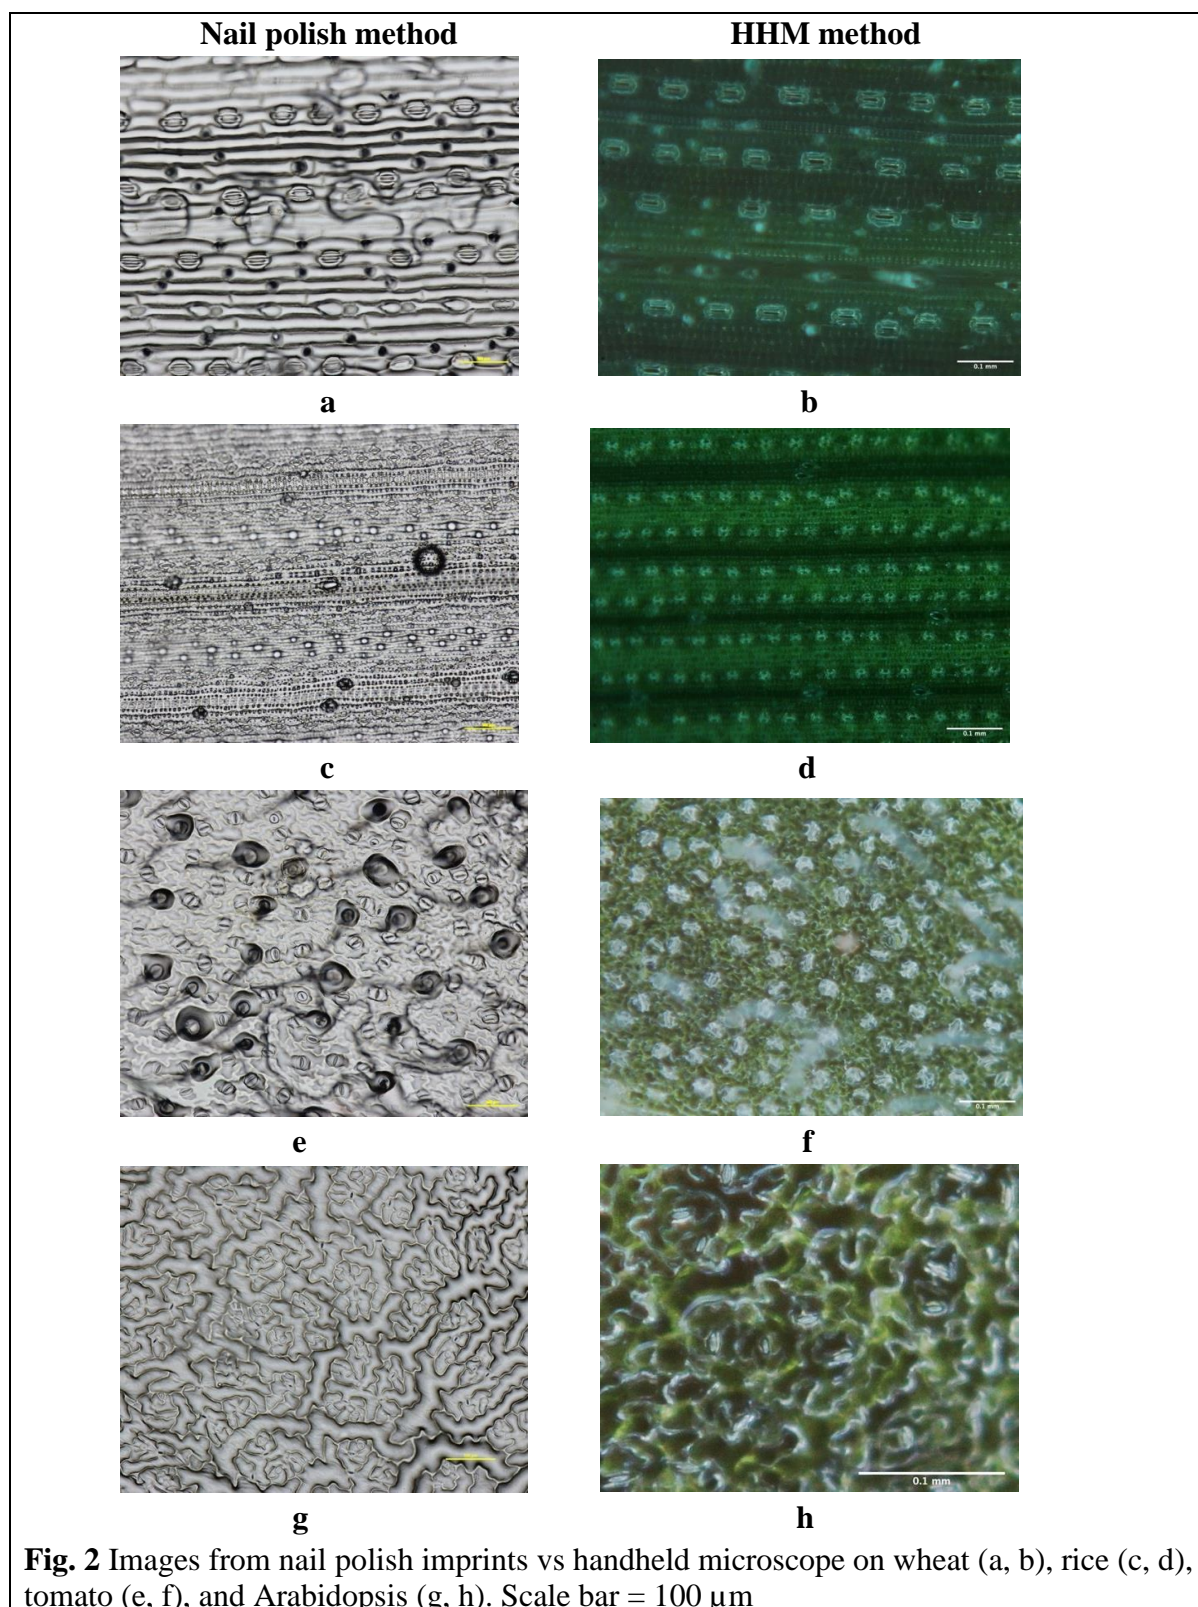

**Fig. 2** Images from nail polish imprints vs handheld microscope on wheat (a, b), rice (c, d), tomato (e, f), and Arabidopsis (g, h). Scale bar = 100 µm

177 Images of wheat leaves using 100× magnification were not at high resolution, but  
178 stomata were still recognizable using the machine-learning program. Images at 200× and  
179 400× magnifications were clearer, which allowed to measure both the number and the size of  
180 stomata. For rice, the nail polish imprints were uneven, which not allow to focus on all  
181 stomata in one image; hence, at least two images at a different focus per sample needed to be  
182 taken. Given their smaller size, the stomata in rice leaves could only be observed using the  
183 400× magnification of the HHM. The images obtained were a little blurry, but stomata could  
184 still be recognized and analysed using the machine-learning program. For tomato, the nail  
185 polish imprints were as clear as the images taken with the HHM and stomata could be seen  
186 with a 400× magnification. In contrast, for Arabidopsis, the nail polish images were clearer  
187 and provided more accurate results than did the HHM images. Even with the 400×  
188 magnification, the HHM could only take images with a limited focus area on the abaxial leaf  
189 surface. Images taken of the adaxial leaf surface were blurry and did not allow for automated  
190 stomata recognition and analysis. However, the HHM significantly accelerated image  
191 acquisition (Fig. 3).

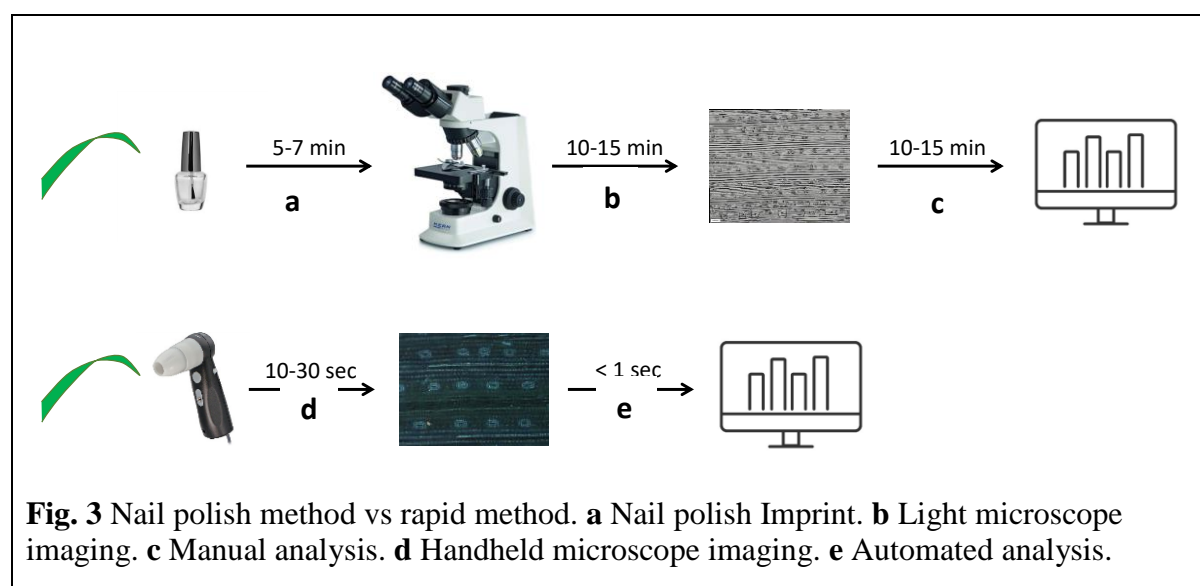

192

193 **Accuracy of the machine-learning model**

194 The precision of the wheat model was best under the 400× magnifications compared to the  
195 200× and 100× (0.99, 0.91 and 0.954, respectively – Table 2). Wheat had the best precision  
196 compared to rice, tomato and Arabidopsis using the same 400× magnification (0.99, 0.89,  
197 0.84 and 0.74, respectively). The recall was high for wheat (0.99), rice (0.92), and tomato  
198 (0.91) but was lower in Arabidopsis (0.77) (Table 2, Fig. 4).

199

200 **Table 2 Statistical result of the model**

| <b>Stomata detection model</b> | <b>Precision</b> | <b>Recall</b> |
|--------------------------------|------------------|---------------|
| Wheat (400×)                   | 0.99             | 0.997         |
| Wheat (200×)                   | 0.91             | 0.91          |
| Wheat (100×)                   | 0.954            | 0.978         |
| Rice                           | 0.888            | 0.916         |
| Tomato                         | 0.843            | 0.911         |
| Arabidopsis                    | 0.741            | 0.769         |

201

202

203 **Accuracy of the results using the machine-learning program**

204 Stomata detection using the machine-learning model was highly accurate, meaning that the  
205 model was able to detect most of the stomata in an image (Table 3). In wheat, accuracy for  
206 the 100x, 200x and 400x magnifications was 89%, 95.8% and 95.6%, respectively. The  
207 accuracy of the model was 92.3% for rice, 88% for tomato and 89.5% for Arabidopsis with  
208 the 400x magnification (Fig. 4, Table 3).

209

210

211

212

213



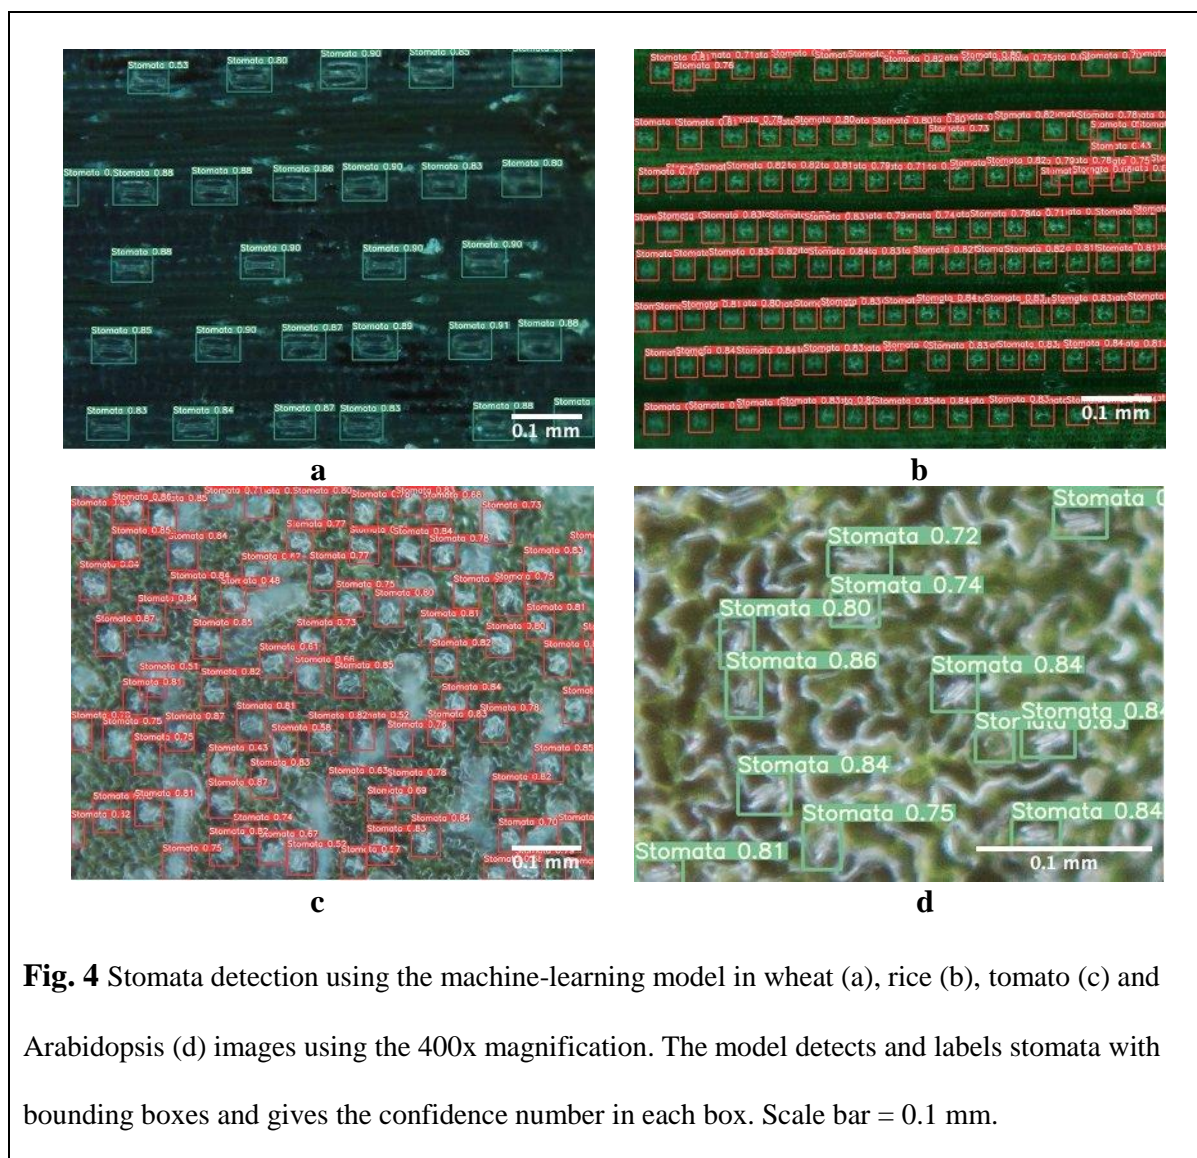

214

215 **Table 3. Average percentage of total stomata detected by the models in each species.**

| Species          | Accuracy (%) |
|------------------|--------------|
| Wheat 400×       | 95.56        |
| Wheat 200×       | 95.79        |
| Wheat 100×       | 89.15        |
| Rice 400×        | 92.25        |
| Tomato 400×      | 87.96        |
| Arabidopsis 400× | 89.49        |

216

## 217 **Discussion**

218 The HHM provided clear images of the wheat, rice, tomato leaf surface, and Arabidopsis  
219 adaxial leaf surface non-destructively in a few seconds. Image capture using the HHM  
220 depends on experience and environmental conditions. The optimal conditions for taking  
221 stomata images using a HHM are when the sky is cloudy because it reduces the sunlight  
222 intensity that can influence image clarity and can interfere with viewing the image on the  
223 screen before taking it. If sunlight is unavoidable, the experimental setting can be shaded to  
224 minimize sunlight interference.

225         The advantages of this method are the speed of taking clear images by using the HHM  
226 and the automated analysis of number and size of stomata that is highly accurate. The HHM  
227 can be used to take images anywhere as it is portable. The images taken can be viewed  
228 immediately and other images of the same leaf can be taken if one image is not satisfactory.  
229 Once all leaf images are taken, it can be directly uploaded to the stomata detection model and  
230 the results can be obtained within seconds. In contrast, the nail polish method requires more  
231 time to obtain leaf imprints, transport of samples to the light microscope and more to view  
232 and capture the images by using a light microscope, then analysing stomata manually which  
233 takes up to 30 minutes per sample. If the images are not satisfactory after this long process,  
234 other leaf imprints need to be taken, which is also time consuming. Although some recent  
235 methods included a machine-learning program to analyse stomata automatically, they still  
236 require taking leaf imprints using nail polish and taking images using a light microscope  
237 (8,14,15).

238         In this experiment, it was difficult to take clear images of the adaxial side of  
239 Arabidopsis leaves. The difficulties encountered might be due to the different structure of the  
240 adaxial leaf surface where mesophyll cells are more densely packed compared to the abaxial  
241 surface where there is space between cells (20).

242 A high throughput (30 seconds per image) stomatal phenotyping method opens up the  
243 opportunities for screening large populations for variation in stomatal traits. The was not  
244 previously achievable due to the length of time it took to obtain images with the nail polish  
245 technique. Using this method, stomatal traits can be screened for in large populations such as  
246 biparental mapping and genome-wide association (GWAS) panels, which require a large  
247 number of populations to be genotypic and phenotypic (21,22). Many studies on drought,  
248 heat and salt stress have been looking at biparental mapping and GWAS populations to  
249 investigate the association between genotype and phenotype by screening for morphological  
250 traits such as biomass or plant weight (22,23,24,25,26,27). Stomatal traits can now be  
251 screened in such populations using the proposed method.

252 In the future, the proposed method can be developed further by including  
253 measurements of stomatal aperture in the model analysis, so the users can have more  
254 information available to improve their decision-making. The method could also be adapted to  
255 identify other leaf traits such as trichome and plant epidermal cells as the HHM can capture  
256 those features that can be detected automatically using machine-learning.  
257 This rapid method is affordable and can be readily used by any individual since it does not  
258 require specific skills in computer science or programming. The user needs to take images  
259 using an HHM and download images on the image analysis pipeline available on Google  
260 Colab (Supp. 3).

261

## 262 **Conclusion**

263 The proposed method provides a rapid non-destructive tool for stomata phenotyping, that is,  
264 determining stomata number and size. The experimental setup is portable and allows stomata  
265 phenotyping at a large scale, which will allow breeders to accelerate identification of new

266 traits for drought tolerance in crops. Further, the model developed can be trained with images  
267 of other species using the same pipeline.

268

### 269 **Competing interests**

270 The authors declare no conflict of interest.

271

### 272 **Funding**

273 The Australian Grains Research and Development Corporation (GRDC)

274

### 275 **Authors' contributions**

276 AE and SR conceived the project. AE, SR and PP designed the experiments. PP and AE

277 performed the experiments. PP, ZZ and AE analysed the data. PP, ZZ, SR and AE interpreted

278 the data. All authors drafted the manuscript.

279

## 280 **References**

- 281 1. Willmer C, Fricker, M. The Distribution of Stomata. In: Black, M. and Charlwood, B.  
282 Stomata. 2nd. Netherlands: Dordrecht, Springer; 1996. P. 12-35.
- 283 2. Lawson T, Blatt MR. Stomatal size, speed, and responsiveness impact on  
284 photosynthesis and water use efficiency. *Plant Physiol.* 2014;164(4):1556-70.
- 285 3. Nunes TDG, Zhang D, Raissig MT. Form, development and function of grass  
286 stomata. *Plant J.* 2020;101(4):780-99.
- 287 4. Bertolino LT, Caine RS, Gray JE. Impact of stomatal density and morphology on  
288 water-use efficiency in a changing world. *Front Plant Sci.* 2019;10:225.
- 289 5. Caine RS, Yin X, Sloan J, Harrison EL, Mohammed U, Fulton T, et al. Rice with  
290 reduced stomatal density conserves water and has improved drought tolerance under future  
291 climate conditions. *New Phytol.* 2019;221(1):371-84.
- 292 6. Harrison EL, Arce Cubas L, Gray JE, Hepworth C. The influence of stomatal  
293 morphology and distribution on photosynthetic gas exchange. *The Plant journal: for cel and*  
294 *molecular biology.* 2020;101(4):768-79.
- 295 7. Hatfield JL, Dold C. Water-Use Efficiency: Advances and Challenges in a Changing  
296 Climate. *Frontiers in Plant Science.* 2019;10.
- 297 8. Scarpeci TE, Zanol MI, Valle EM. Estimation of stomatal aperture in *Arabidopsis*  
298 *thaliana* using silicone rubber imprints. *Bio Protoc.* 2017;7(12):e2347-e.
- 299 9. Berger D, Altmann T. A subtilisin-like serine protease involved in the regulation of  
300 stomatal density and distribution in *Arabidopsis thaliana*. *Genes Dev.* 2000;14(9):1119–31.
- 301 10. Scarpeci TE, Freja VS, Zanol MI, Valle EM. Overexpression of AtERF019 delays  
302 plant growth and senescence, and improves drought tolerance in *Arabidopsis*. *J Exp Bot.*  
303 2017;68(3):673–85.



- 304 11. Kagan ML, Novoplansky N, Sachs T. Variable cell lineages form the Functional pea  
305 epidermis. *Ann Bot.* 1992;69(4):303–12.
- 306 12. Schlüter U, Muschak M, Berger D, Altmann T. Photosynthetic performance of an  
307 *Arabidopsis* mutant with elevated stomatal density (*sdd1-1*) under different light regimes. *J*  
308 *Exp Bot.*
- 309 13. Millstead L, Jayakody H, Patel H, Kaura V, Petrie PR, Tomasetig F, et al.  
310 Accelerating automated stomata analysis through simplified sample collection and imaging  
311 techniques. *Front Plant Sci.* 2020;11(1493).
- 312 14. Jayakody H, Liu S, Whitty M, Petrie P. Microscope image based fully automated  
313 stomata detection and pore measurement method for grapevines. *Plant Methods.*  
314 2017;13(1):94.
- 315 15. Kwong QB, Wong YC, Lee PL, Sahaini MS, Kon YT, Kulaveerasingam H, et al.  
316 Automated stomata detection in oil palm with convolutional neural network. *Scientific*  
317 *Reports.* 2021;11(1):15210.
- 318 16 Liang X, Xu X, Wang Z, He L, Zhang K, Liang B, et al. StomataScorer: a portable  
319 and high-throughput leaf stomata trait scorer combined with deep learning and an improved  
320 CV model. *Plant biotechnology journal.* 2022;20(3):577-91.
- 321 17. Zhuangzhuang S, Yunlin S, Qing L, Jian C, Xiao W, Qin Z, et al. An Integrated  
322 Method for Tracking and Monitoring Stomata Dynamics from Microscope Videos. *Plant*  
323 *phenomics.* 2021;2021:9835961-.
- 324 18. Tzotalin. LabelImg. Git code. 2015. <https://github.com/tzotalin/labelImg>
- 325 19. Powers DMW. Evaluation: from precision, recall and F-measure to ROC,  
326 informedness, markedness and correlation. 2020.
- 327 20. Nakata M. and Okada K. The Leaf Adaxial-Abaxial Boundary and Lamina Growth.  
328 *Plants* 2013, 2(2), 174-202.

- 329 21. Flint J. GWAS. *Current biology*. 2013;23(7):R265-R6.
- 330 22. Jabbari M, Fakheri BA, Aghnoum R, Mahdi Nezhad N, Ataei R. GWAS analysis in  
331 spring barley (*Hordeum vulgare* L.) for morphological traits exposed to drought. *PloS one*.  
332 2018;13(9):e0204952-e.
- 333 23. Abdelraheem A, Thyssen GN, Fang DD, Jenkins JN, McCarty JC, Wedegaertner T, et  
334 al. GWAS reveals consistent QTL for drought and salt tolerance in a MAGIC population of  
335 550 lines derived from intermating of 11 Upland cotton (*Gossypium hirsutum*) parents.  
336 *Molecular genetics and genomics: MGG*. 2020;296(1):119-29.
- 337 24. Li B, Chen L, Sun W, Wu D, Wang M, Yu Y, et al. Phenomics-based GWAS analysis  
338 reveals the genetic architecture for drought resistance in cotton. *Plant biotechnology journal*.  
339 2020;18(12):2533-44.
- 340 25. Prado SA, Cabrera-Bosquet L, Grau A, Coupel-Ledru A, Millet EJ, Welcker C, et al.  
341 Phenomics allows identification of genomic regions affecting maize stomatal conductance  
342 with conditional effects of water deficit and evaporative demand. *Plant, cell and environment*.  
343 2018;41(2):314-26.
- 344 26. Scott MF, Ladejobi O, Amer S, Bentley AR, Biernaskie J, Boden SA, et al. Multi-  
345 parent populations in crops: a toolbox integrating genomics and genetic mapping with  
346 breeding. *Heredity*. 2020;125(6):396-416.
- 347 27. Furbank RT, Tester M. Phenomics – technologies to relieve the phenotyping  
348 bottleneck. *Trends in Plant Science*. 2011;16(12):635-44.
